# Supplementary material
Source: PubMed Central journal article supplement (PMC2707278)
Supplement: NIHMS97951-supplement-01.pdf [file NIHMS97951-supplement-01.pdf]

**Supplementary Figure 1. GCC immunization does not intensify mucosal autoimmunity during active experimental colitis.** A, female C57BL/6 mice were treated with a 7 day course of DSS *ad libitum* in the drinking water, followed by normal water. Mice were immunized with Control-AV or GCC-AV on day 5 and boosted sequentially with RV and VV at 7 day intervals. Mouse weights were monitored daily. Data indicate means and error bars indicate 95% confidence intervals ( $P > 0.05$  Bonferroni's multiple comparison's test on area under the curve (AUC) values, Control vs. GCC -immunized DSS treatment groups, Supplementary Fig. 2). B-D, mice were euthanized on day 23 for examination of disease markers including diarrhea (B), fecal blood (C) and histology (D). Images in  $D_1$  are representative sections from treated mice and  $D_2$  indicates histological scores from treated mice. Data in B-D indicate means of N=5-11 mice per group and error bars indicate standard deviation (#  $P > 0.05$  Bonferroni's multiple comparison test).

**Supplementary Figure 2. Area under the curve (AUC) analysis of DSS-induced colitis.** Negative area-under-the-curve (AUC) peaks were calculated on weight curves from untreated naïve, control-immunized and GCC-immunized mice and those treated with DSS *ad libitum*. Mice were immunized by heterologous prime boost prior to DSS administration (PBB→DSS; Figure 3) or beginning on day 5 after DSS initiation (DSS→PBB; Supplementary Figure 1). \*\*  $P < 0.01$ , \*\*\*  $P < 0.001$ , #  $P > 0.05$  Bonferroni's multiple comparison test.

**Supplementaary Figure 3. Histological scores of selected treatment regimens.** Colons of mice from treatment regimens including acute, intermediate and chronic immunization as well as immunization prior to, or during, DSS-induced IBD were scored

water between each cycle. *D*, colons were collected 10 days after the final cycle and examined. Tumor number (*E*) and size (*F*) were determined under a dissecting microscope. Error bars indicate 95% confidence intervals (#  $P > 0.05$  two-sided Welch's *t* test).

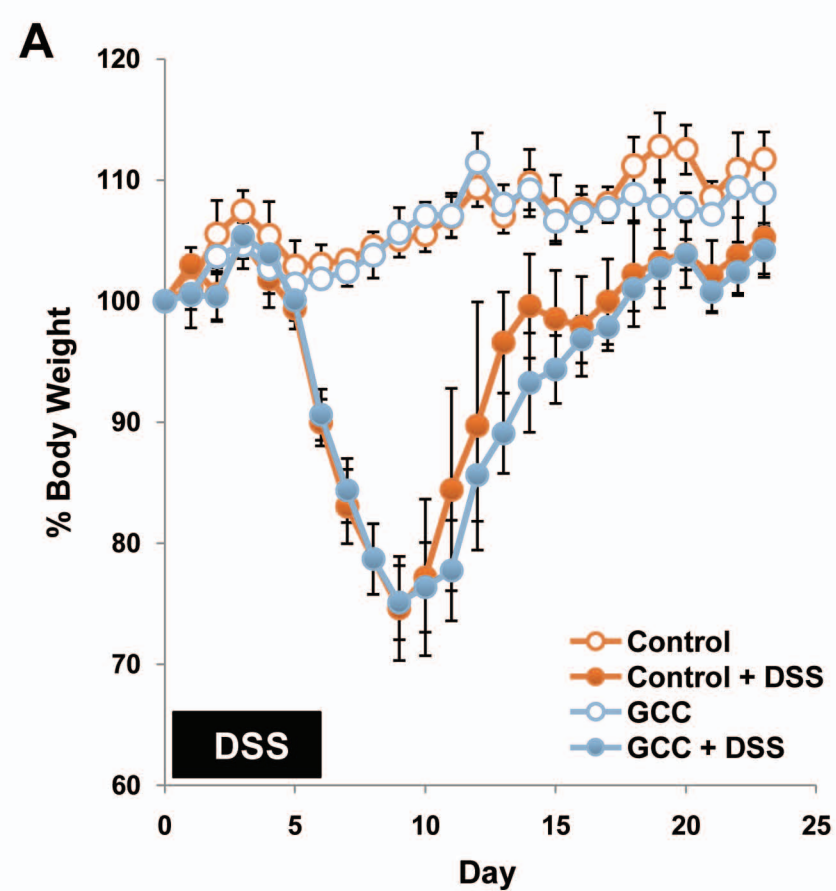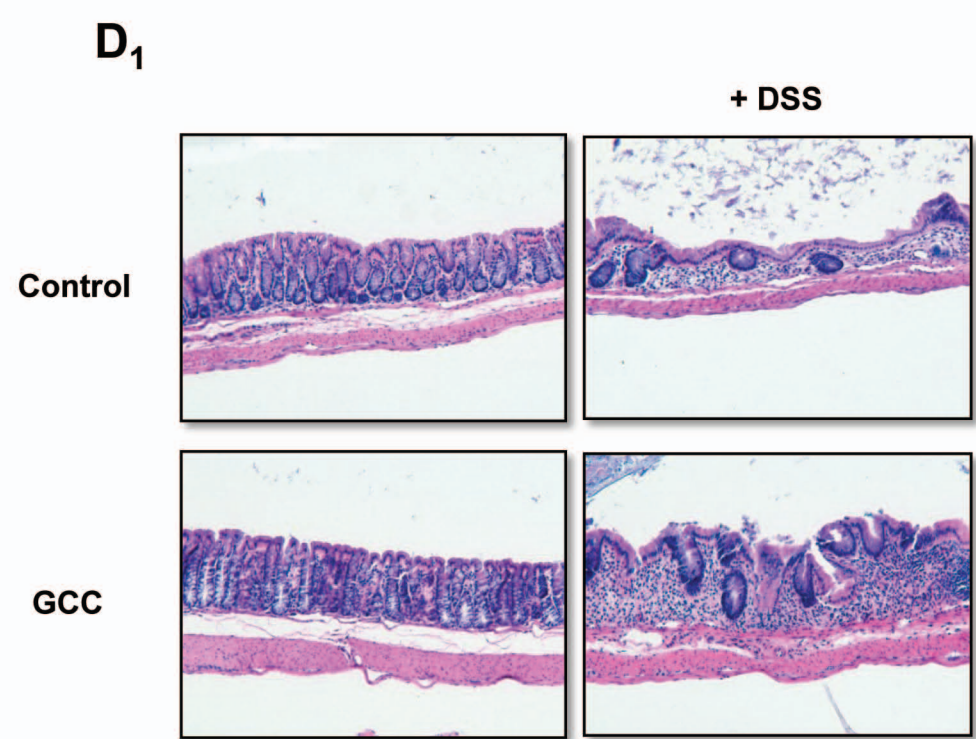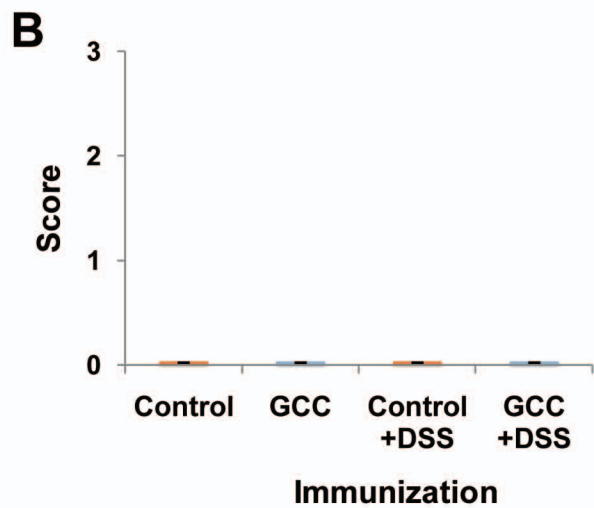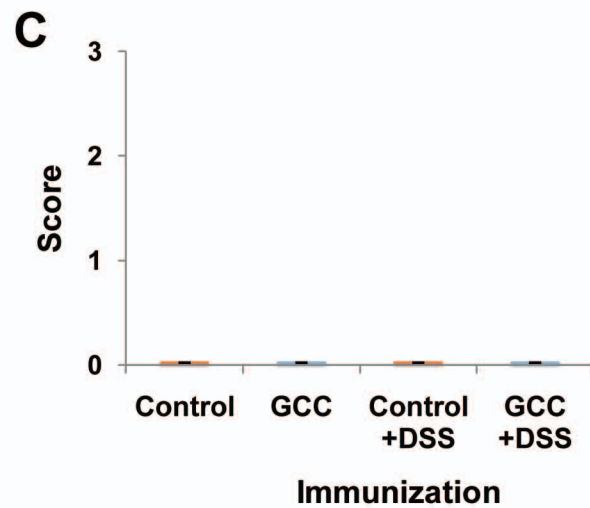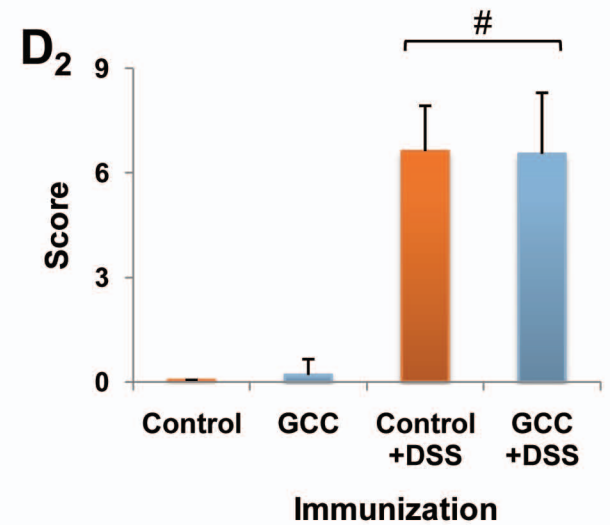

Supplemental Figure 1

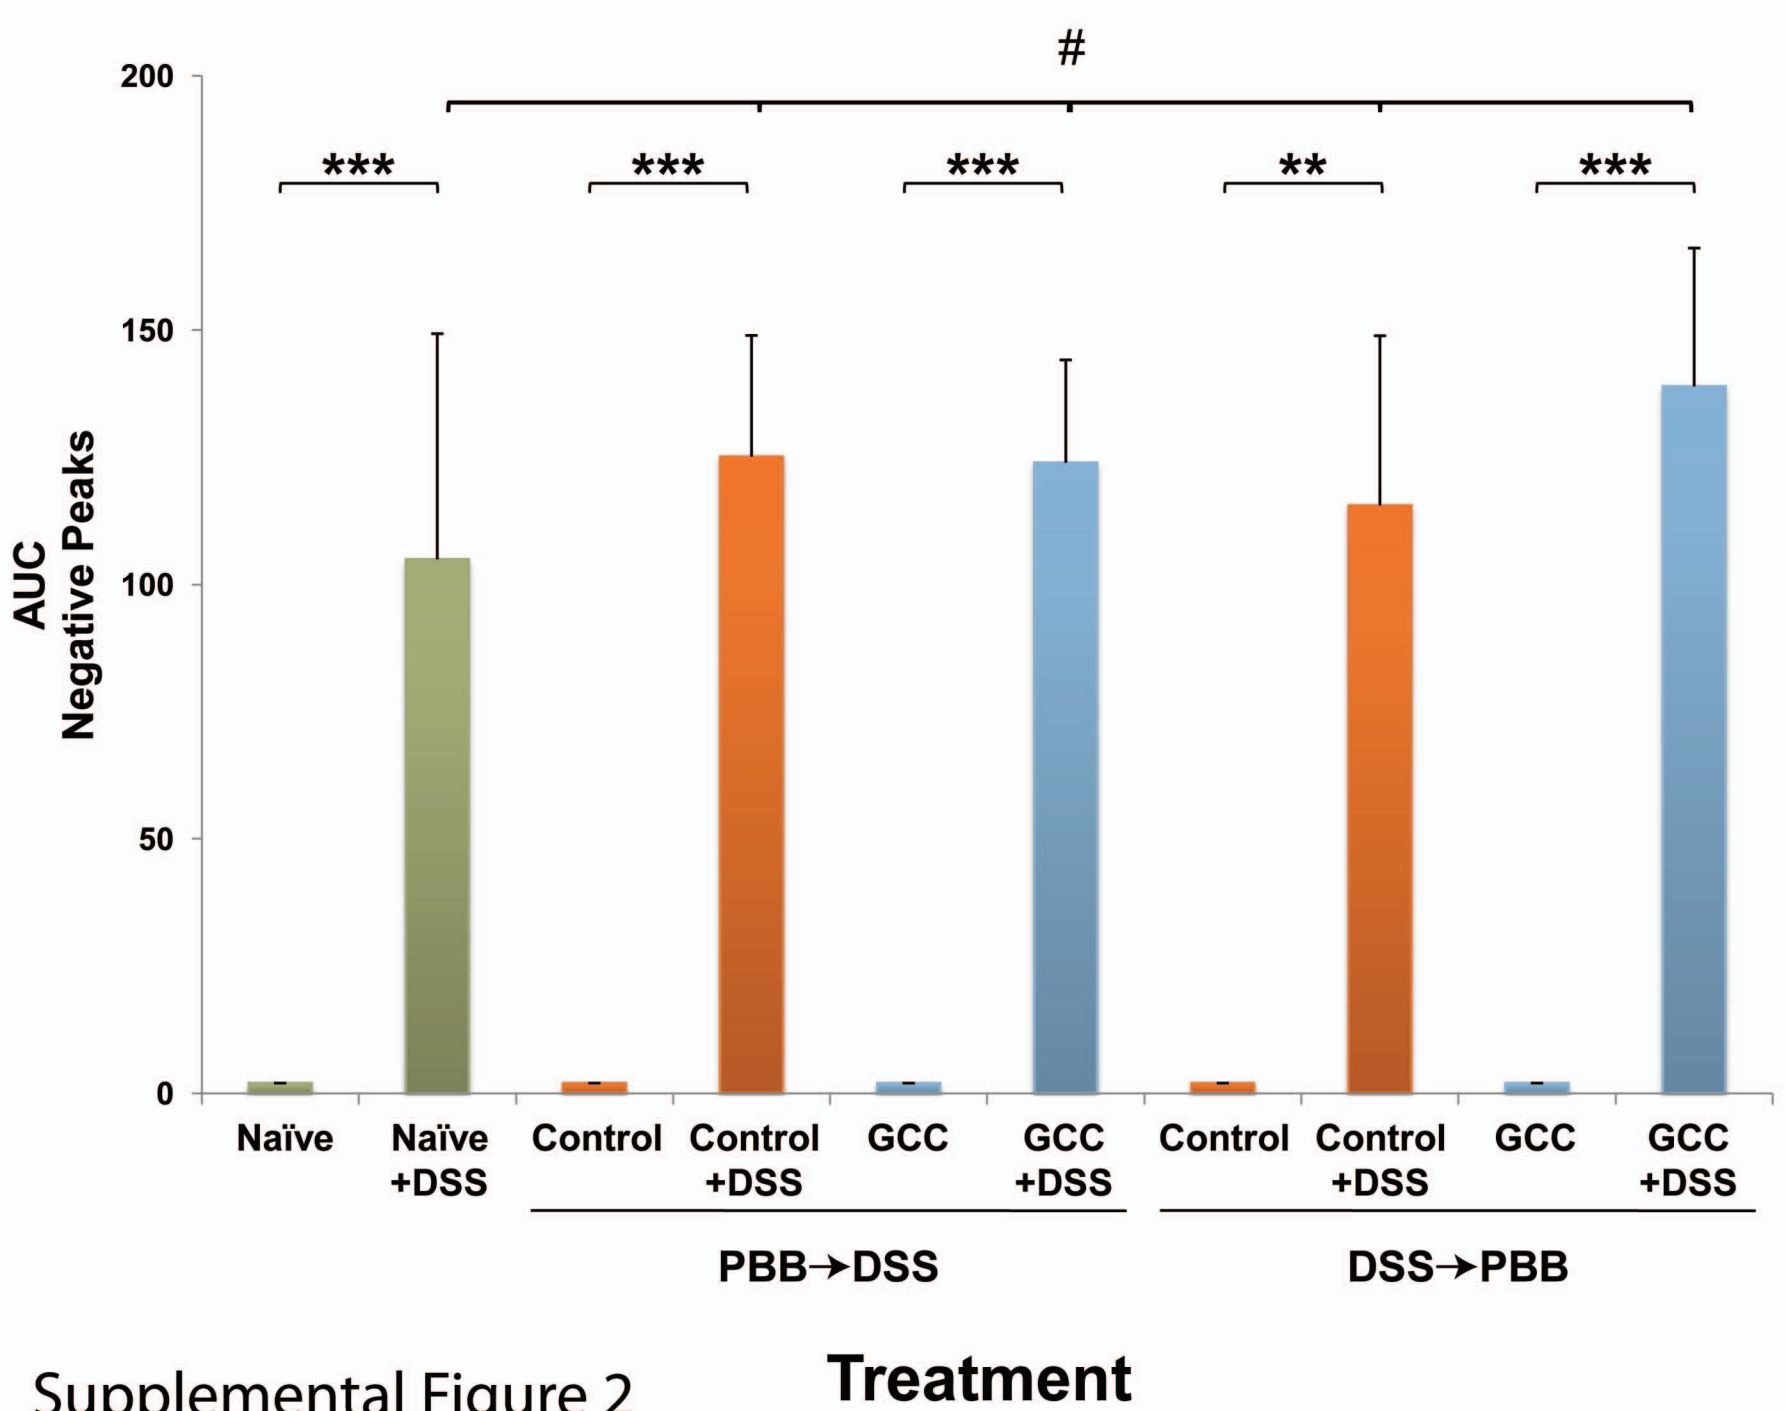

Supplemental Figure 2

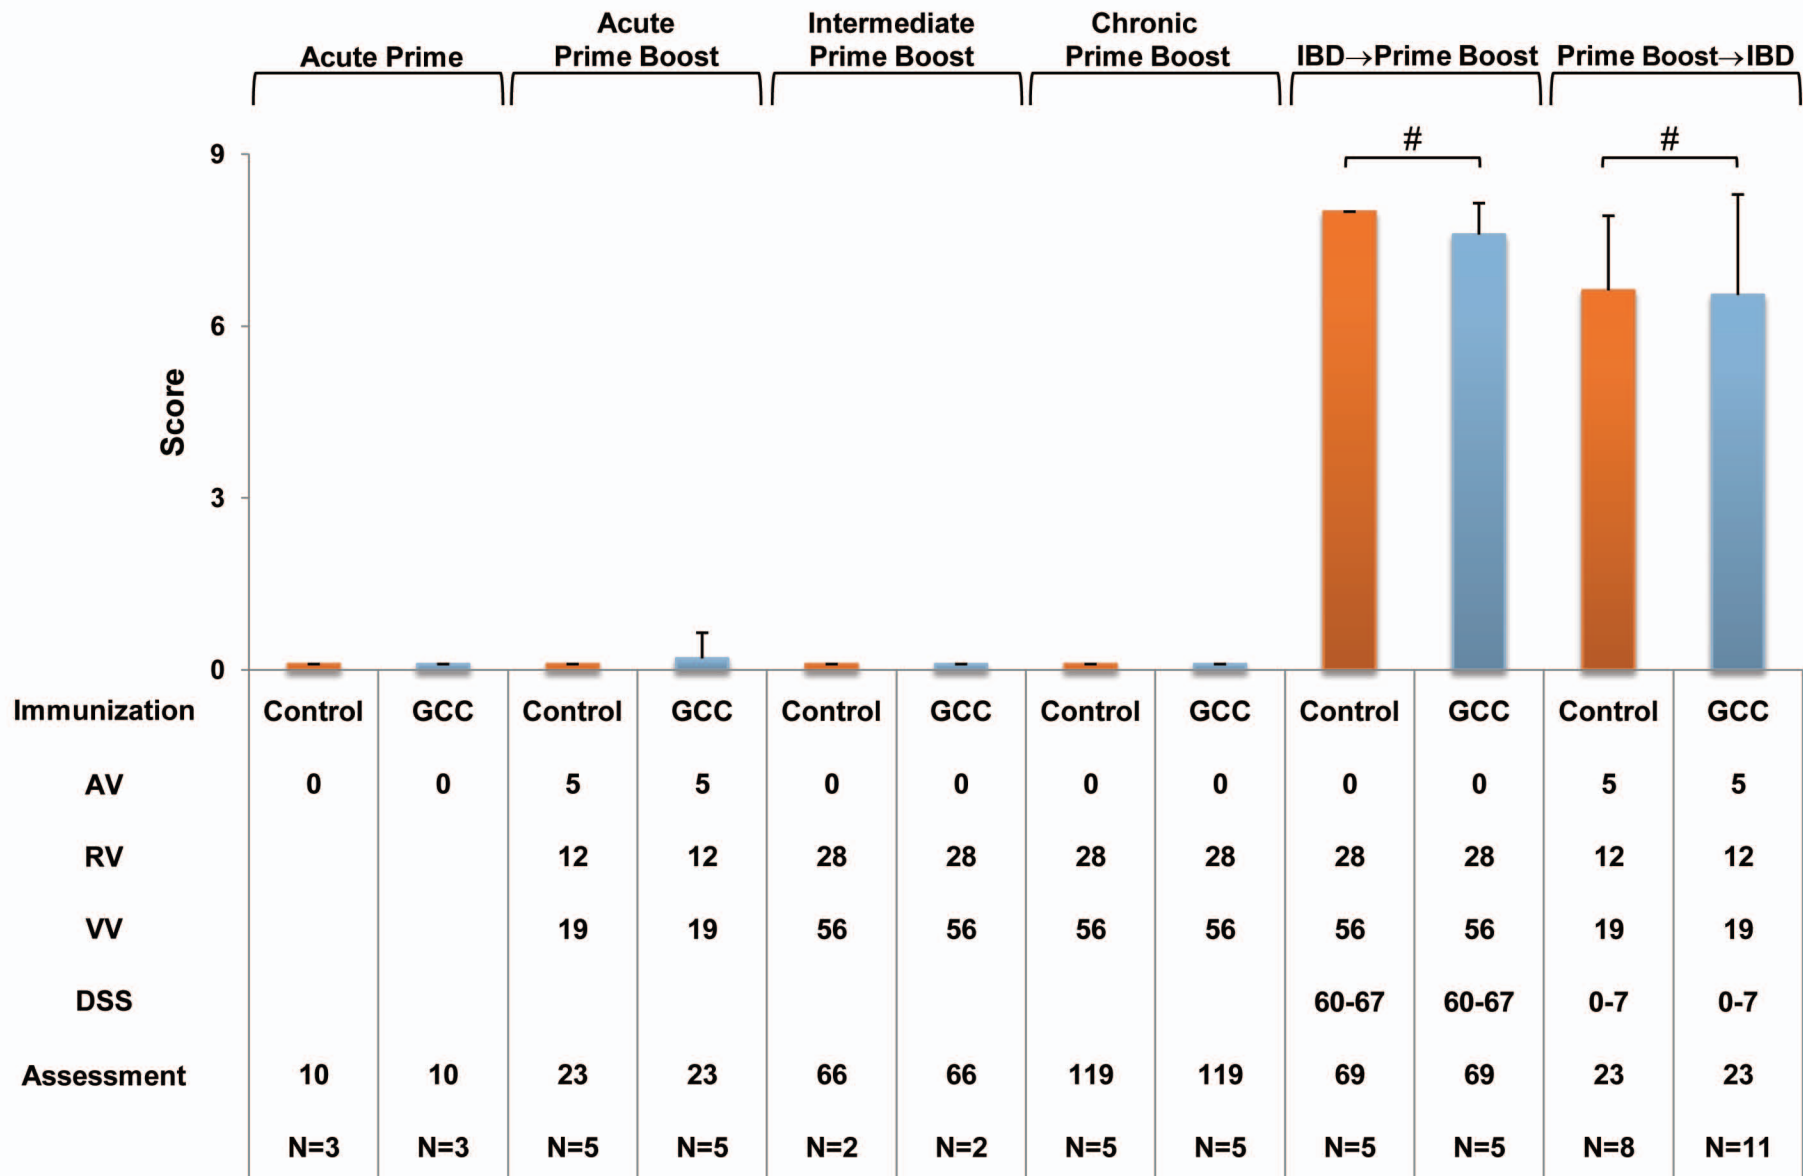

Supplemental Figure 3

Numbers indicate day of treatment beginning on day 0
